# Supplementary material for: Identification of a noncanonical RNA binding domain in the U2 snRNP protein SF3A1
Source: PubMed Central journal article supplement — RNA. 2019 Nov;25(11):1509–21. doi: 10.1261/rna.072256.119 (PMC6795144; doi:10.1261/rna.072256.119), 2019-11
Supplement: supp_072256.119_Supplemental_Data.pdf [file supp_072256.119_Supplemental_Data.pdf]

## SUPPLEMENTAL FIGURES

# Identification of a non-canonical RNA binding domain in the U2 snRNP protein SF3A1

William Martelly<sup>1, 3</sup>, Bernice Fellows<sup>1</sup>, Kristen Senior<sup>1</sup>, Tim Marlowe<sup>2</sup> and Shalini Sharma<sup>1,\*</sup>

<sup>1</sup>Department of Basic Medical Sciences, University of Arizona, College of Medicine-Phoenix, Phoenix, Arizona 85004, USA

<sup>2</sup>Molecular Analysis Core, University of Arizona, College of Medicine-Phoenix, Phoenix, Arizona 85004, USA

<sup>3</sup>School of Life Sciences, Arizona State University, Tempe, Arizona 85287, USA

\*To whom correspondence should be addressed: Tel: 1-602-827-2149; Fax: 1-602-827-2127; Email: [shalinijs@email.arizona.edu](mailto:shalinijs@email.arizona.edu).

Present Address: Shalini Sharma, Department of Basic Medical Sciences, University of Arizona, College of Medicine-Phoenix, Phoenix, Arizona 85004, USA

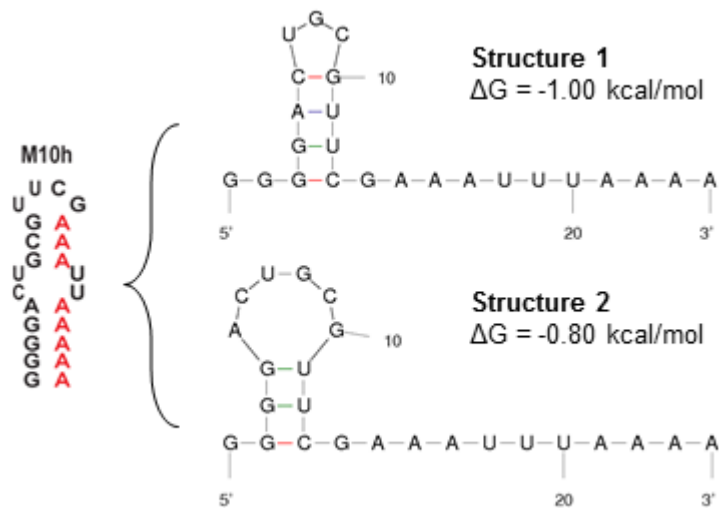

**Figure S1. Secondary structure prediction of U1-SL4 M10h mutant.** The two lowest free-energy ( $\Delta G$ ) structures for the M10h RNA as predicted by mfold are shown. The non-specific binding observed for this ligand in competitive EMSA experiments may be explained by the capacity to form short stem-loops *in vitro*.

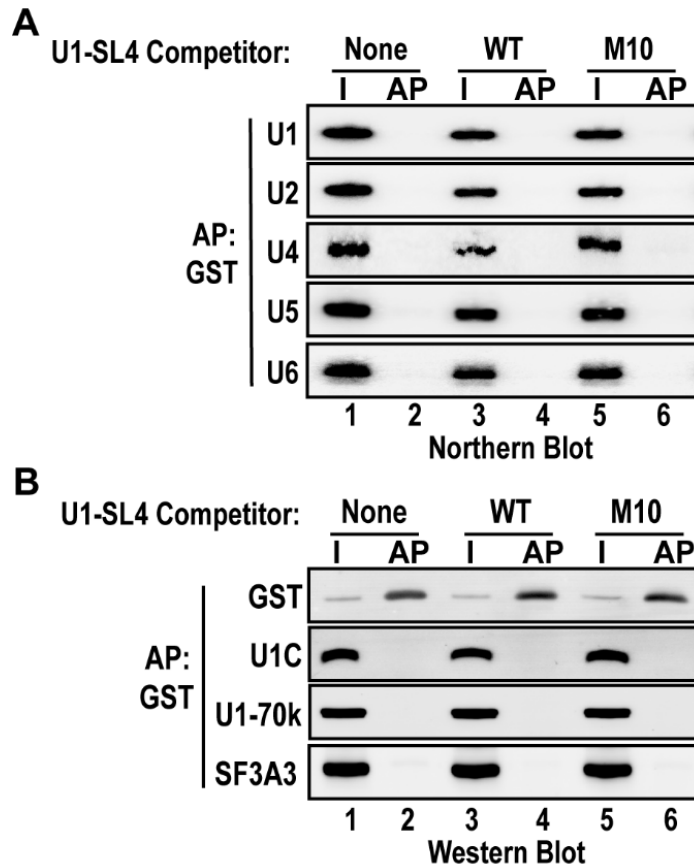

**Figure S2. Analysis of U1 proteins and major spliceosomal RNAs present in control GST pull-down complexes.** (A) Northern blotting of U1, U2, U4, U5, and U6 snRNA show no enrichment of any snRNAs in GST alone affinity-purification fractions. (B) Immunoblotting of proteins present in the GST affinity pull-down complexes demonstrating the lack of enrichment of U1C, U1-70k or SF3A3. I and AP indicate input and affinity pull-down complexes, respectively.

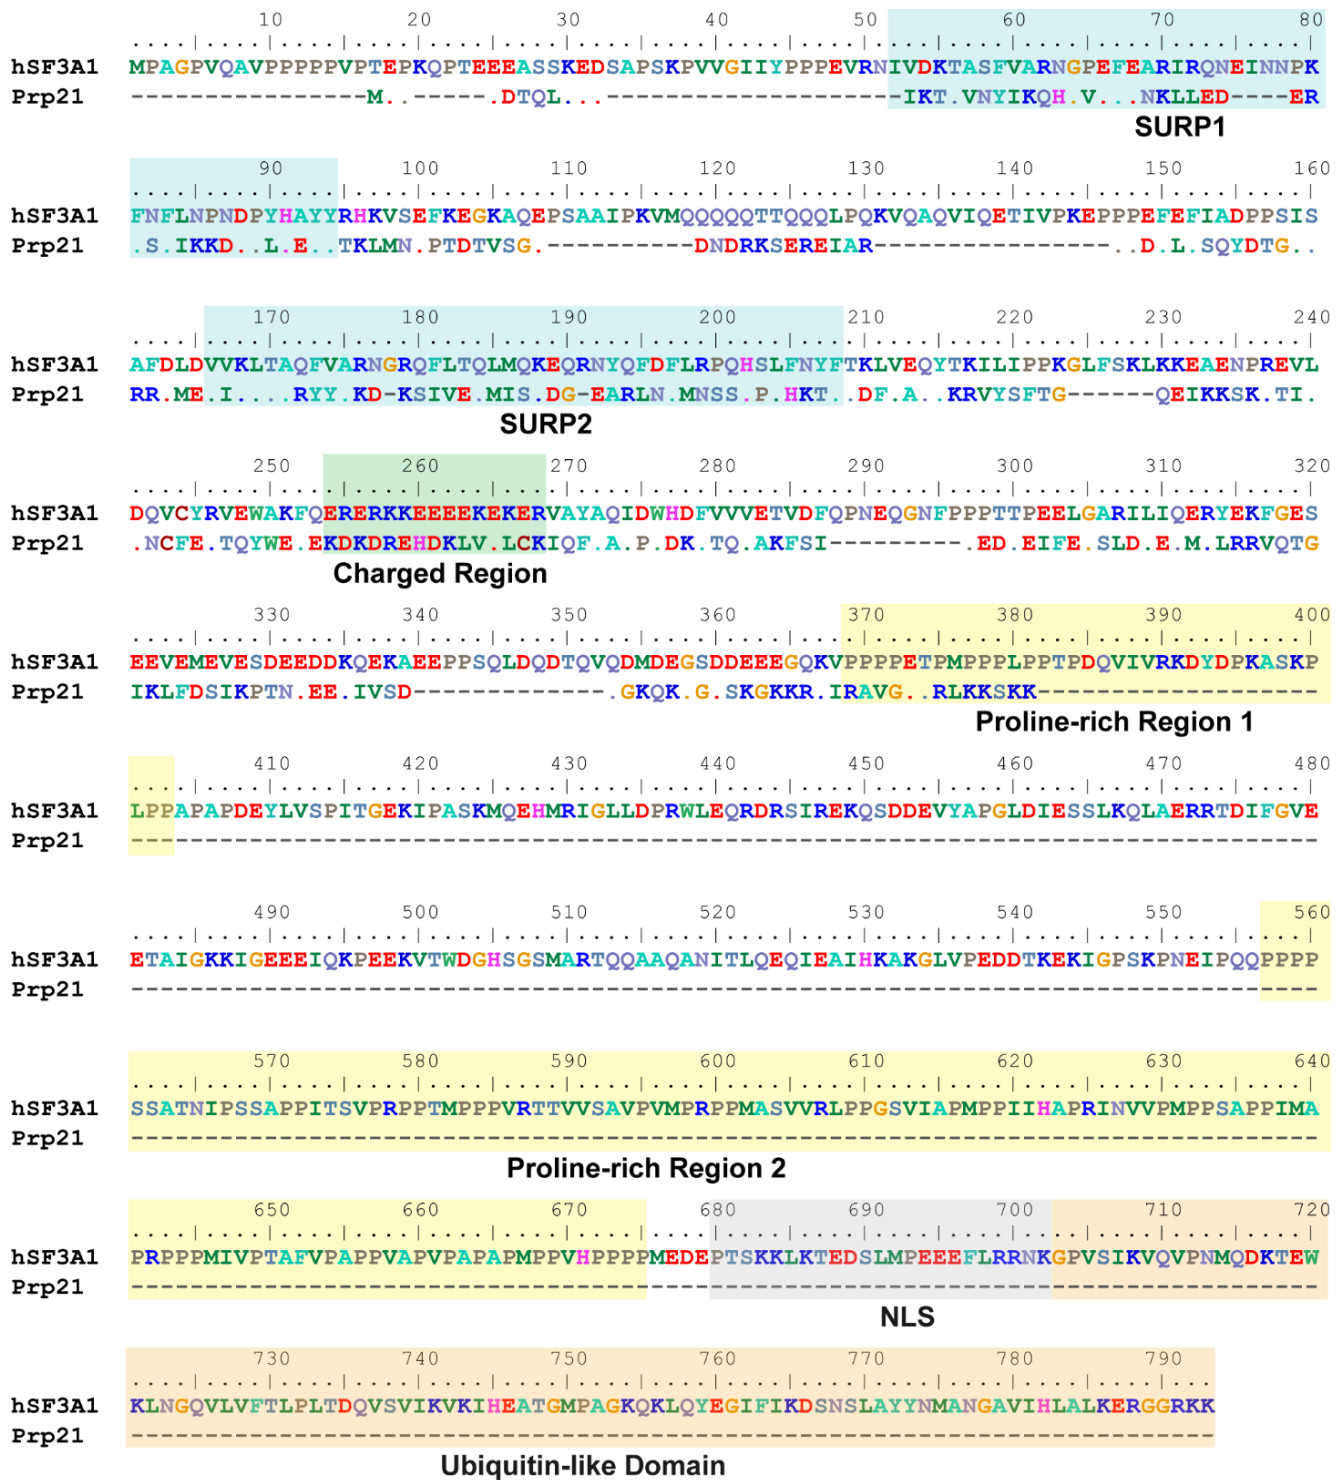

**Figure S3. Alignment of full-length SF3A1 protein from human and yeast.** SF3A1 from *Saccharomyces cerevisiae* (Prp21; UniProt ID: P32524) was aligned to human SF3A1 (hSF3A1; UniProt ID: Q15459) using ClustalW. The N-terminal features of SF3A1 are conserved between yeast and humans; including the two SURP domains and the small region of charged residues. Prp21 lacks the large proline rich regions, nuclear localization signal, and the UBL domain. In the aligned sequences, a dot indicates the presence of a residue identical to reference (hSF3A1) and a dash indicates a gap.

**Table S1. Identity matrix comparing SF3A1 UBL domains in higher eukaryotes.**

| <b>Identity Matrix</b> | <b>H. sapiens</b> | <b>M. musculus</b> | <b>D. rerio</b> | <b>D. melanogaster</b> | <b>C. elegans</b> |
|------------------------|-------------------|--------------------|-----------------|------------------------|-------------------|
| <b>H. sapiens</b>      | <b>1.0</b>        | <b>0.978</b>       | <b>0.934</b>    | <b>0.472</b>           | <b>0.373</b>      |
| <b>M. musculus</b>     |                   | <b>1.0</b>         | <b>0.912</b>    | <b>0.461</b>           | <b>0.373</b>      |
| <b>D. rerio</b>        |                   |                    | <b>1.0</b>      | <b>0.450</b>           | <b>0.351</b>      |
| <b>D. melanogaster</b> |                   |                    |                 | <b>1.0</b>             | <b>0.406</b>      |
| <b>C. elegans</b>      |                   |                    |                 |                        | <b>1.0</b>        |

**Table S2. Accession numbers of UBL domain containing proteins with SF3A1-like features.**

| <b>Protein Name</b> | <b>UBL Family</b> | <b>UniProt Accession</b> |
|---------------------|-------------------|--------------------------|
| SF3A1               | UBL               | Q15459                   |
| MAP2K5              | PB1               | Q13163                   |
| PARD6B              | PB1               | Q9BYG5                   |
| UBIQUITIN           | UB                | P0CG47                   |
| RPS27A              | NEDD8             | P62979                   |
| NEDD8               | NEDD8             | Q15843                   |
| ZFAND4              | UBL               | Q86XD8                   |
| URM1                | UBL               | Q9BTM9                   |
| UBD UBL-2           | UBL               | O15205                   |
| OASL UBL-2          | UBL               | Q15646                   |
| DDI1                | UBL               | Q8WTU0                   |
| DDI2                | UBL               | Q5TDH0                   |
| SQSTM1              | PB1               | Q13501                   |
| SNRNP25             | UBL               | Q9BV90                   |
| UHRF1               | UBL               | Q96T88                   |
| RAD23A              | PIM               | P54725                   |
| RAD23B              | PIM               | P54727                   |
| UBL5                | UBL               | Q9BZL1                   |
| PRKCI               | PB1               | P41743                   |
| UBD UBL-1           | UBL               | O15205                   |
| OASL UBL-1          | UBL               | Q15646                   |
| UBL7                | UBL               | Q96S82                   |
| UHRF2               | PIM               | Q96PU4                   |
| UBL4B               | PIM               | Q8N7F7                   |
| BAG6                | PIM               | A0A0G2JK23               |
| MAP1LC3A            | ATG8              | Q9H492                   |
| MAP1LC3B            | ATG8              | Q9GZQ8                   |
| MAP1LC3B2           | ATG8              | A6NCE7                   |
| MAP1LC3C            | ATG8              | Q9BXW4                   |
| GABARAP             | ATG8              | O95166                   |
| GABARAPL1           | ATG8              | Q9H0R8                   |
| GABARAPL2           | ATG8              | P60520                   |
| PCGF1               | RAWUL             | Q9BSM1                   |

|               |     |        |
|---------------|-----|--------|
| <b>TBK1</b>   | UBL | Q9UHD2 |
| <b>MIDN</b>   | UBL | Q504T8 |
| <b>PARK2</b>  | PIM | O60260 |
| <b>UBAC1</b>  | PIM | Q9BSL1 |
| <b>PARD6A</b> | PB1 | Q9NPB6 |
| <b>BAG1</b>   | PIM | Q99933 |
| <b>NUB1</b>   | PIM | Q9Y5A7 |
| <b>TDP-43</b> | UBL | Q13148 |
| <b>SUMO-1</b> | UBL | P63165 |

**Table S3. Sequences of oligonucleotide probes used for Northern blotting.**

| <b>Oligo Name</b>            | <b>Sequence (5'→3')</b> |
|------------------------------|-------------------------|
| <b>U1<sub>27-46</sub>R</b>   | TGATCACGAAGGTGGTTTTTC   |
| <b>U2<sub>114-135</sub>R</b> | AGATGGAATAGGAGCTTGCTCC  |
| <b>U4<sub>86-106</sub>R</b>  | CCGTGACGACTTGCAATATAG   |
| <b>U5<sub>50-68</sub>R</b>   | GATTTCCGTGGAGAGGAAC     |
| <b>U6<sub>36-57</sub>R</b>   | ACGATACAGAGAAGATTAGCA   |
